# Supplementary material
Source: PubMed Central journal article supplement (PMC3044078)
Supplement: supp_214_6_1028__2.pdf [file supp_214_6_1028__2.pdf]

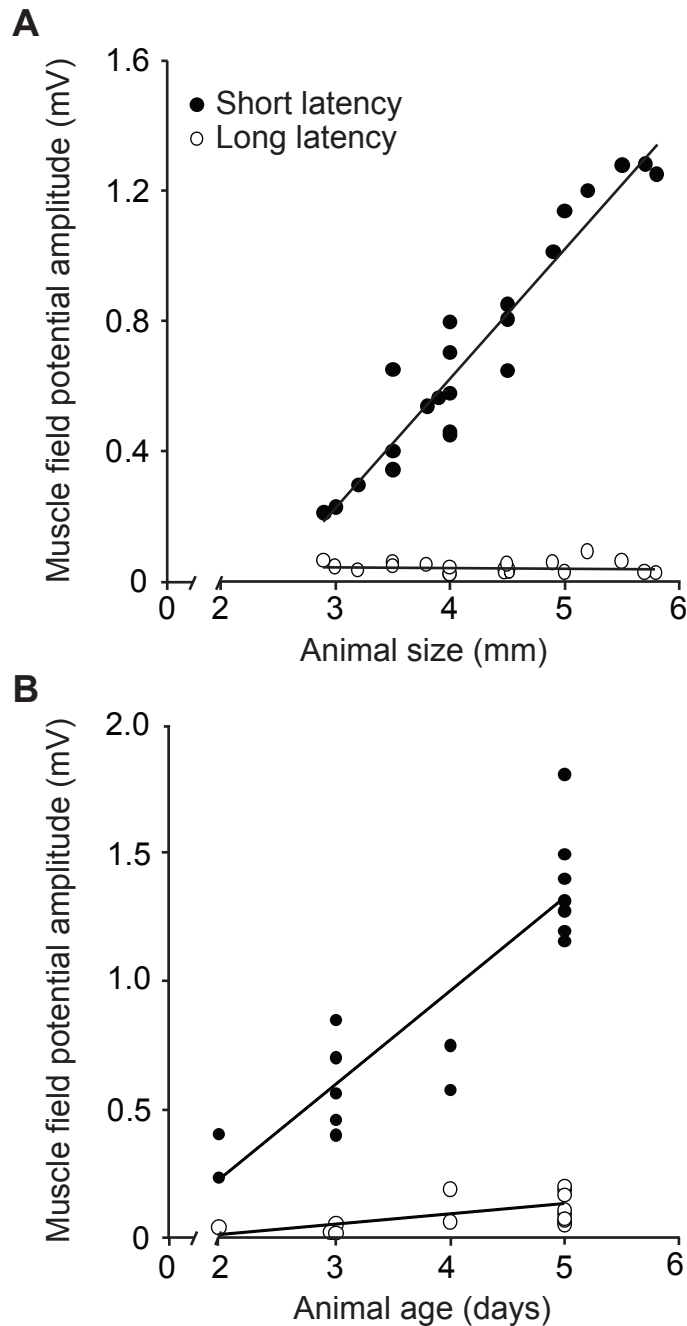

**Fig. S2.** Amplitudes of field potentials change during zebrafish development.

(A) Amplitudes of muscle field potentials generated during short-latency escapes increase linearly as a function of body length ( $r^2 = 0.914$ ). No obvious correlation was detected between body length and the amplitudes of muscle field potentials generated during long-latency escapes ( $r^2 = 0.0094$ ). (B) Amplitudes of muscle field potentials generated during short- and long-latency escapes increase linearly as a function of age (short-latency escapes:  $r^2 = 0.814$ ; long-latency escapes:  $r^2 = 0.0085$ ).
